# Supplementary material
Source: PubMed Central journal article supplement (PMC4356339)
Supplement: cdd2014162x1.pdf [file cdd2014162x1.pdf]

## SUPPLEMENTARY INFORMATION

### **Disruption of astrocyte-neuron cholesterol cross-talk affects neuronal function in Huntington's disease**

Marta Valenza<sup>1§</sup>, Manuela Marullo<sup>1§</sup>, Eleonora Di Paolo<sup>1</sup>, Elisabetta Cesana<sup>2</sup>, Chiara Zuccato<sup>1</sup>, Gerardo Biella<sup>2</sup>, Elena Cattaneo<sup>1\*</sup>

<sup>1</sup>Department of Biosciences and Centre for Stem Cell Research, Università degli Studi di Milano, Milano (Italy); <sup>2</sup>Department of Biology and Biotechnology, Università degli Studi di Pavia, Pavia (Italy). §equal contribution; \*corresponding author

## Supplementary Figure 1

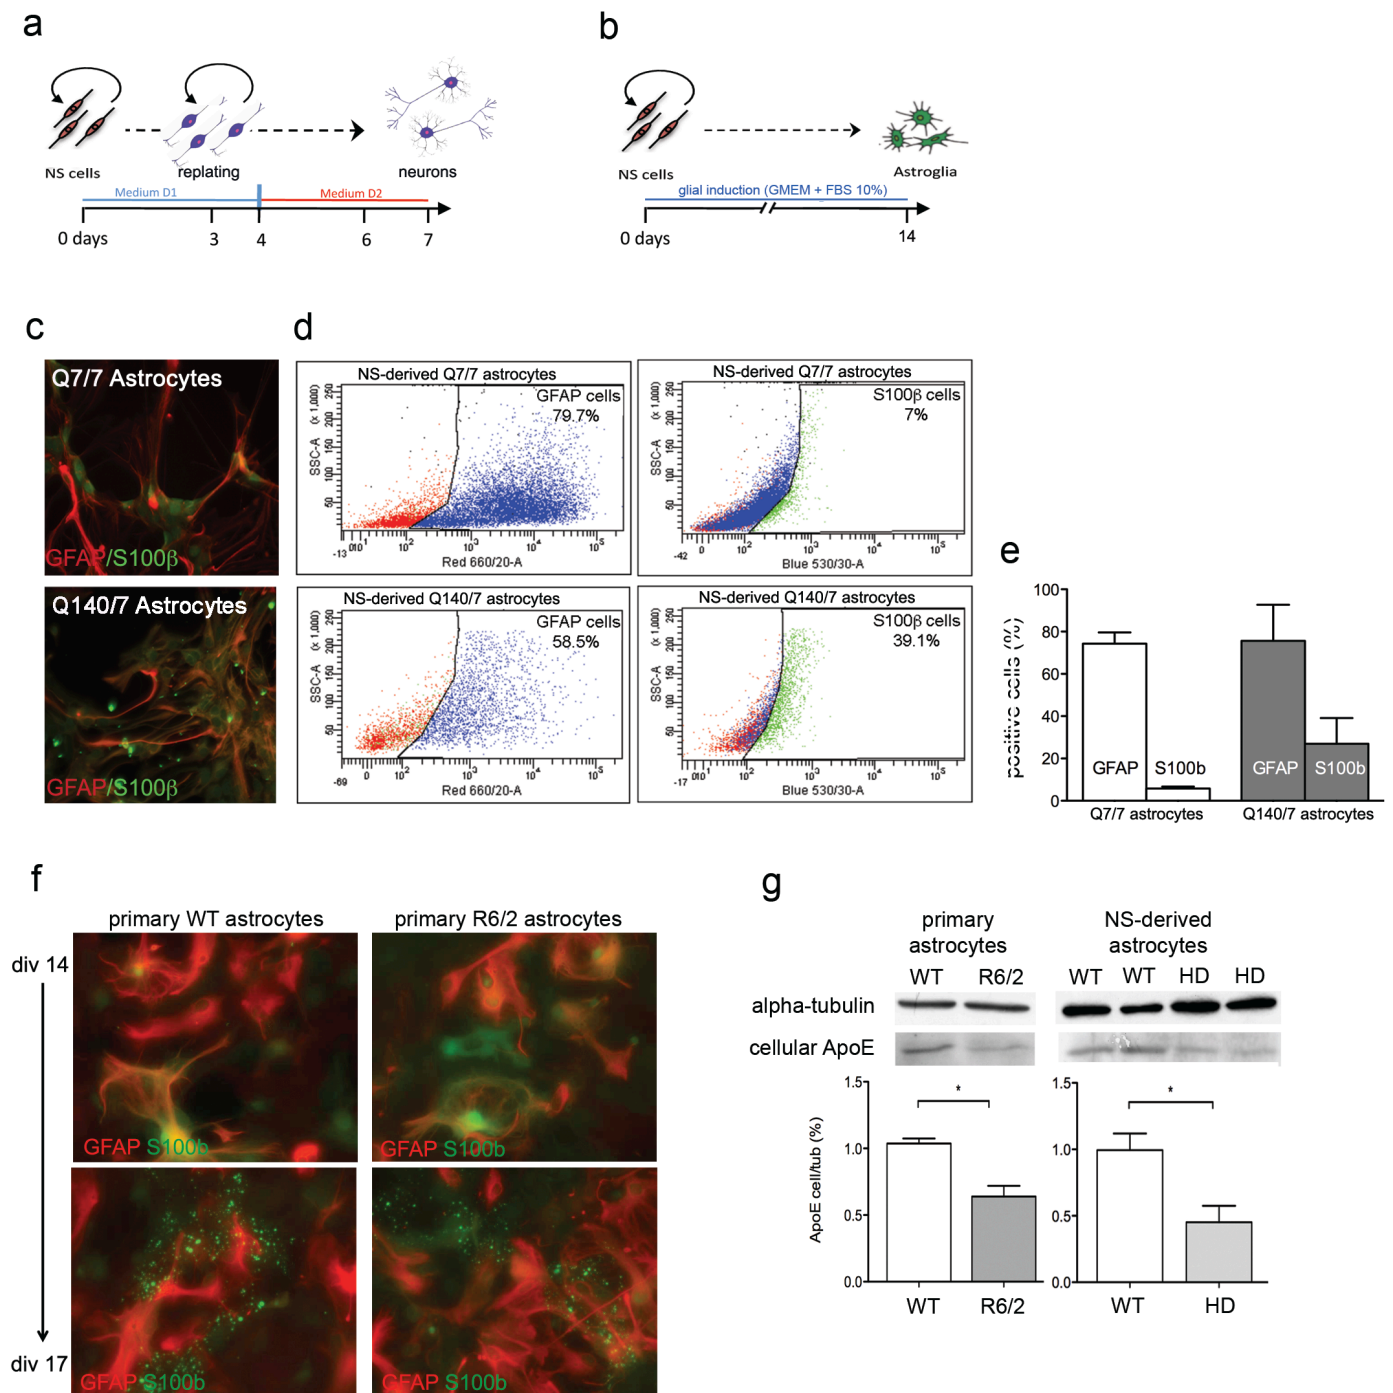

**Supplementary Figure 1.** (a-b) Schematic diagram of differentiation protocol to convert neural stem (NS) cells to generic neurons (a) and to astrocytes (b). (c) Immunofluorescence staining of astrocytes derived from Q7/7 and Q140/7 NS cells after 14 days of glial differentiation with antibodies against GFAP (red) and S100b (green). Original magnification: 20 $\times$ . (d-e) Flow cytometry of Q7/7 and Q140/7 astrocytes for GFAP and S100b. The graph (e) shows the % of GFAP- or S100b-positive cells as the mean  $\pm$  s.e.m. for three independent differentiations. (f) Immunofluorescence staining of primary astrocytes derived from wt and R6/2 pups after 14 and 17 days *in vitro* (div) with antibodies against GFAP (red) and S100b (green). Original magnification: 20 $\times$ . (g) Representative western blot analysis showing intracellular ApoE levels in primary astrocytes from wt and R6/2 astrocytes and in NS-derived astrocytes. Alpha-tubulin was used to normalize apoE levels. The graphs show the mean % above relative controls  $\pm$  s.e.m.

## Supplementary Figure 2

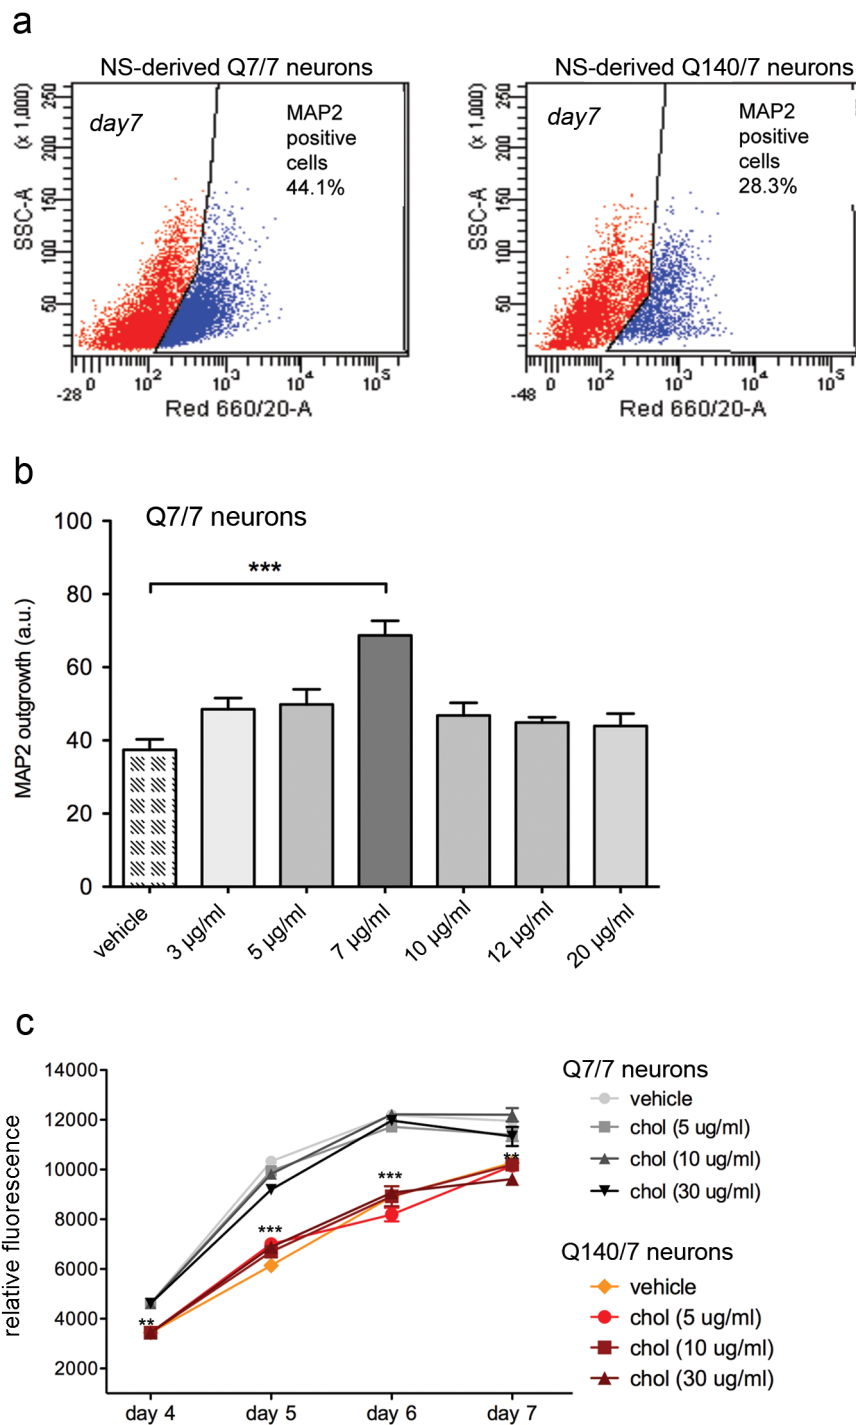

**Supplementary Figure 2.** (a) Flow cytometry of Q7/7 and Q140/7 neurons for MAP2 at day 7 of neuronal differentiation. (b) Neurite outgrowth quantification in Q7/7 neurons under glial-free conditions (vehicle) or in the presence of increasing doses of cholesterol (3, 5, 7, 10, 12, and 20 µg/ml) immunostained for MAP2. Original magnification: 20×. The graph shows mean (a.u.) ± s.e.m. of 10 fields for each condition. (c) Cell survival measured by Cy-quant assay of Q7/7 and Q140/7 neurons under glial-free conditions (vehicle) or in the presence of increasing doses of cholesterol (5, 10, and 30 µg/ml). The graph shows the mean (of triplicates) ± s.e.m. Statistics: one-way ANOVA, Newman–Keuls multiple-comparison test (b,c). \* $P < 0.05$ ; \*\* $P < 0.01$ ; \*\*\* $P < 0.001$ .

## Supplementary Figure 3

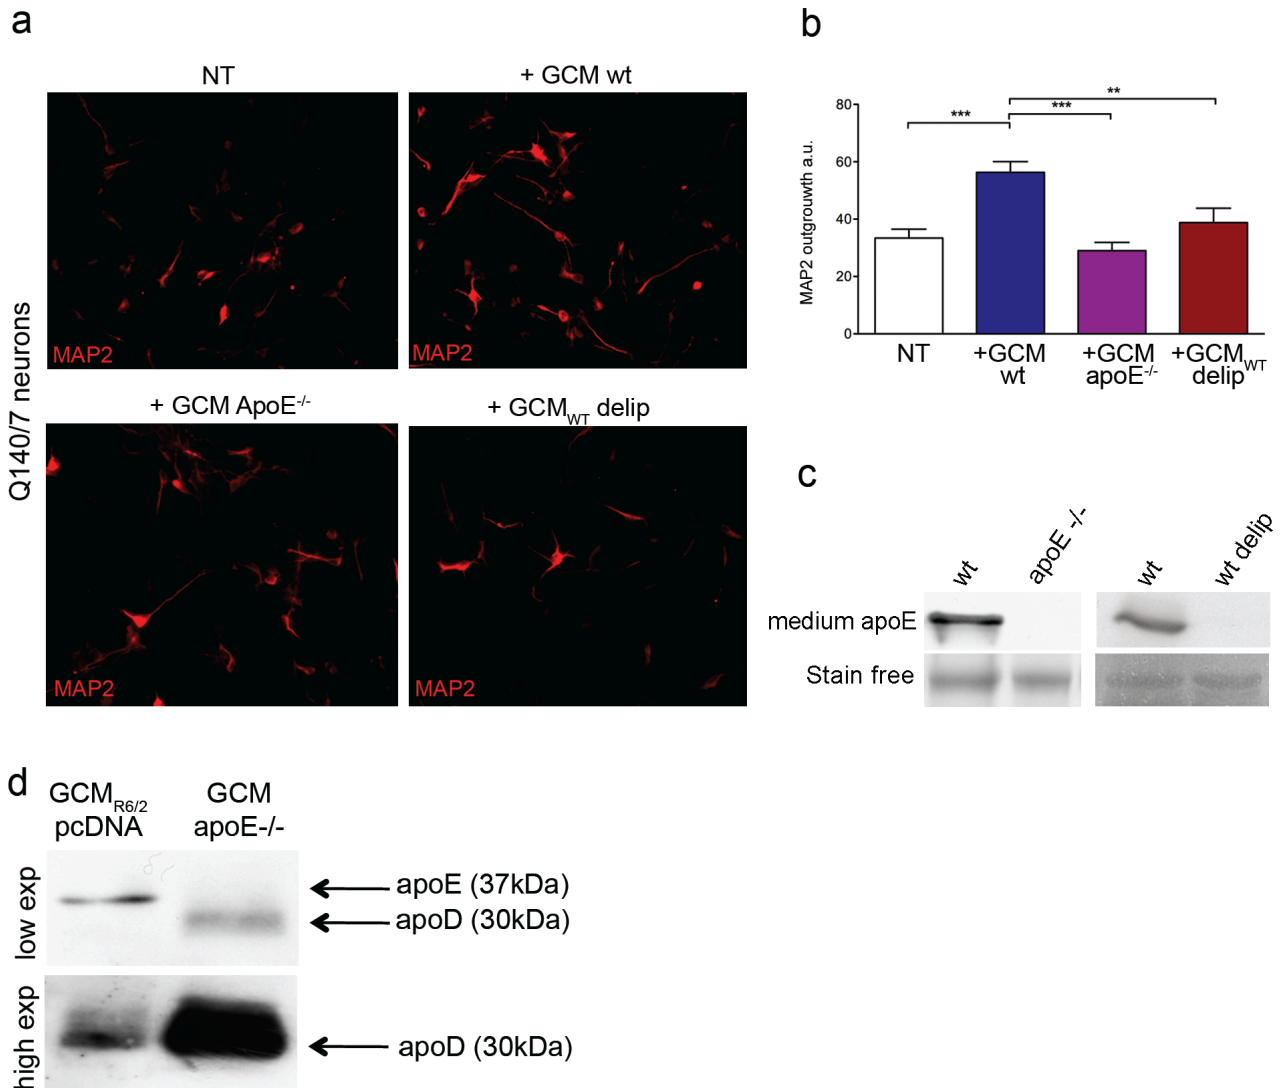

**Supplementary Figure 3.** (a) Representative immunofluorescence staining for MAP2 in Q140/7 neurons under glial-free conditions (NT) or in the presence of GCM from primary astrocytes of wt mice (GCM wt) or from apoE<sup>-/-</sup> mice (GCM apoE<sup>-/-</sup>) and GCM from lipoprotein-depleted wt astrocytes (GCM<sub>wt</sub>delip). Original magnification: 20×. (b) Relative neurite outgrowth quantification. The graph shows the mean of an arbitrary value (a.u.) ± s.e.m. from one experiment in which 10 fields were analyzed for each condition. Similar results were obtained from other two independent differentiations. (c) Representative western blot analysis for apoE levels in GCM apoE<sup>-/-</sup> and in GCM<sub>wt</sub>delip. (d) Representative western blot analysis for apoD in GCM apoE<sup>-/-</sup>. Statistics: one-way ANOVA, Newman–Keuls multiple-comparison test. \**P* < 0.05; \*\**P* < 0.01; \*\*\**P* < 0.001.



## Supplementary Figure 4

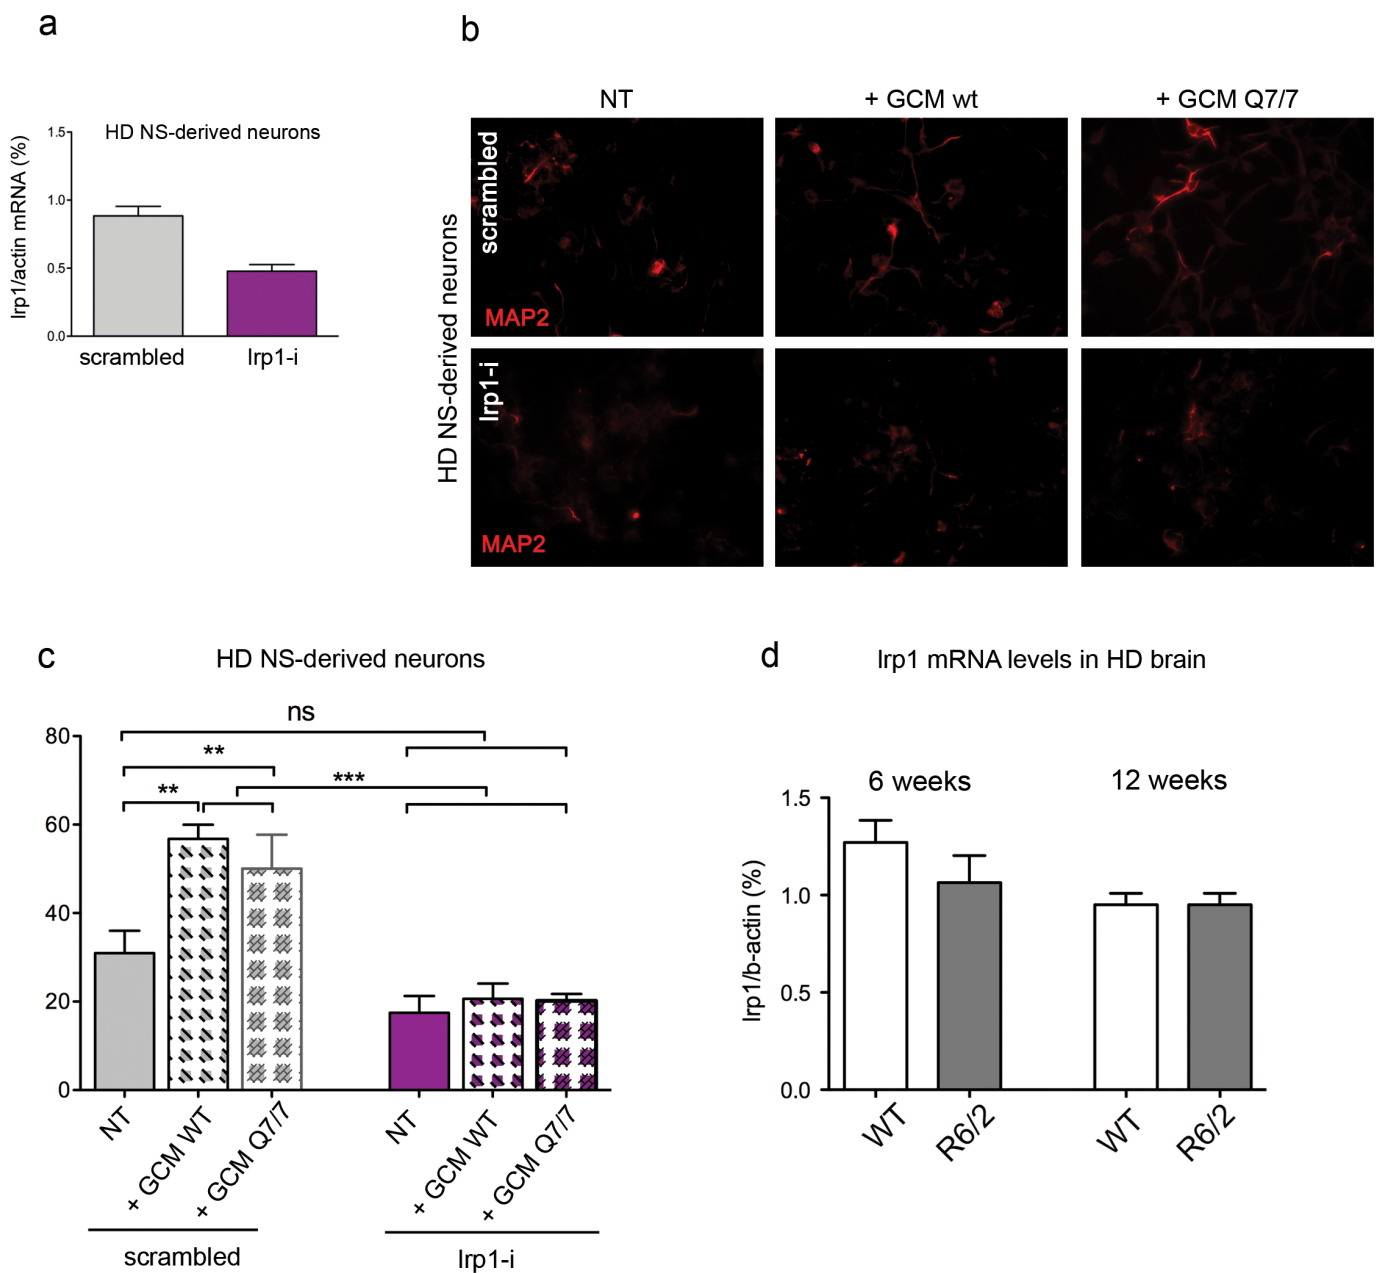

**Supplementary Figure 4.** (a) mRNA levels of *Irf1* in HD neurons after transfection with siRNA against *Irf1* (Irf1-i) compared to the same cells transfected with scramble siRNA as a control (scrambled). (b) Representative immunofluorescence staining for MAP2 in HD neurons (scrambled or after *Irf1* silencing) under glial-free conditions (NT), in the presence of GCM from primary wt astrocytes (GCM wt) or Q7/7 astrocytes (GCM Q7/7). Original magnification: 20 $\times$ . (c) Relative neurite outgrowth quantification. Graph shows the mean of an arbitrary value (a.u.)  $\pm$  s.e.m. (d) mRNA levels for *Irf1* in wt and R6/2 brains at 6 weeks and 12 weeks of age. Graph in (d) shows the mean as % above relative controls  $\pm$  s.e.m. *P* values were determined by one-way ANOVA with Newman-Keuls multiple-comparison post-test. \**P* < 0.05; \*\**P* < 0.01; \*\*\**P* < 0.001.

## Supplementary Figure 5

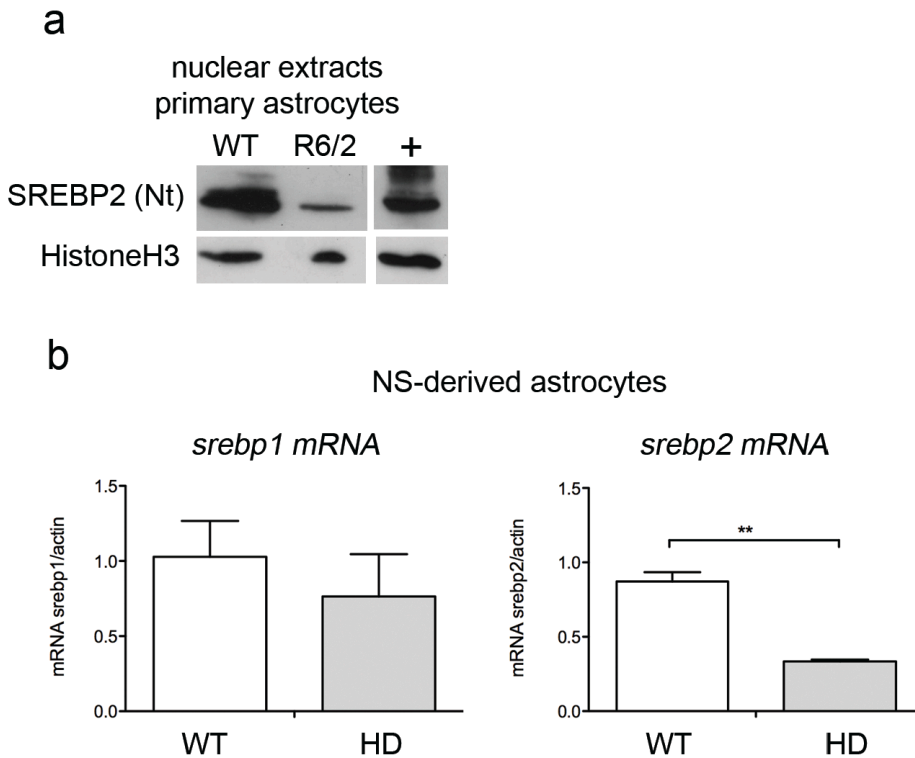

**Supplementary Figure 5.** (a) representative western blot analysis showing protein levels of the active form of SREBP2 in nuclear extracts from primary astrocytes of wt and R6/2 mice. HistoneH3 was used as loading control in nuclear extracts. A nuclear extract from control cell lines (Valenza et al., J. Neurosci 2005) was used as positive control. (b) mRNA levels of *srebp1* and *srebp2* in NS-derived astrocytes. Graphs in (b) show the mean % above relative controls  $\pm$  s.e.m.. *P* values were determined by t-test student. \**P* < 0.05; \*\**P* < 0.01; \*\*\**P* < 0.001.

# Supplementary Figure 6

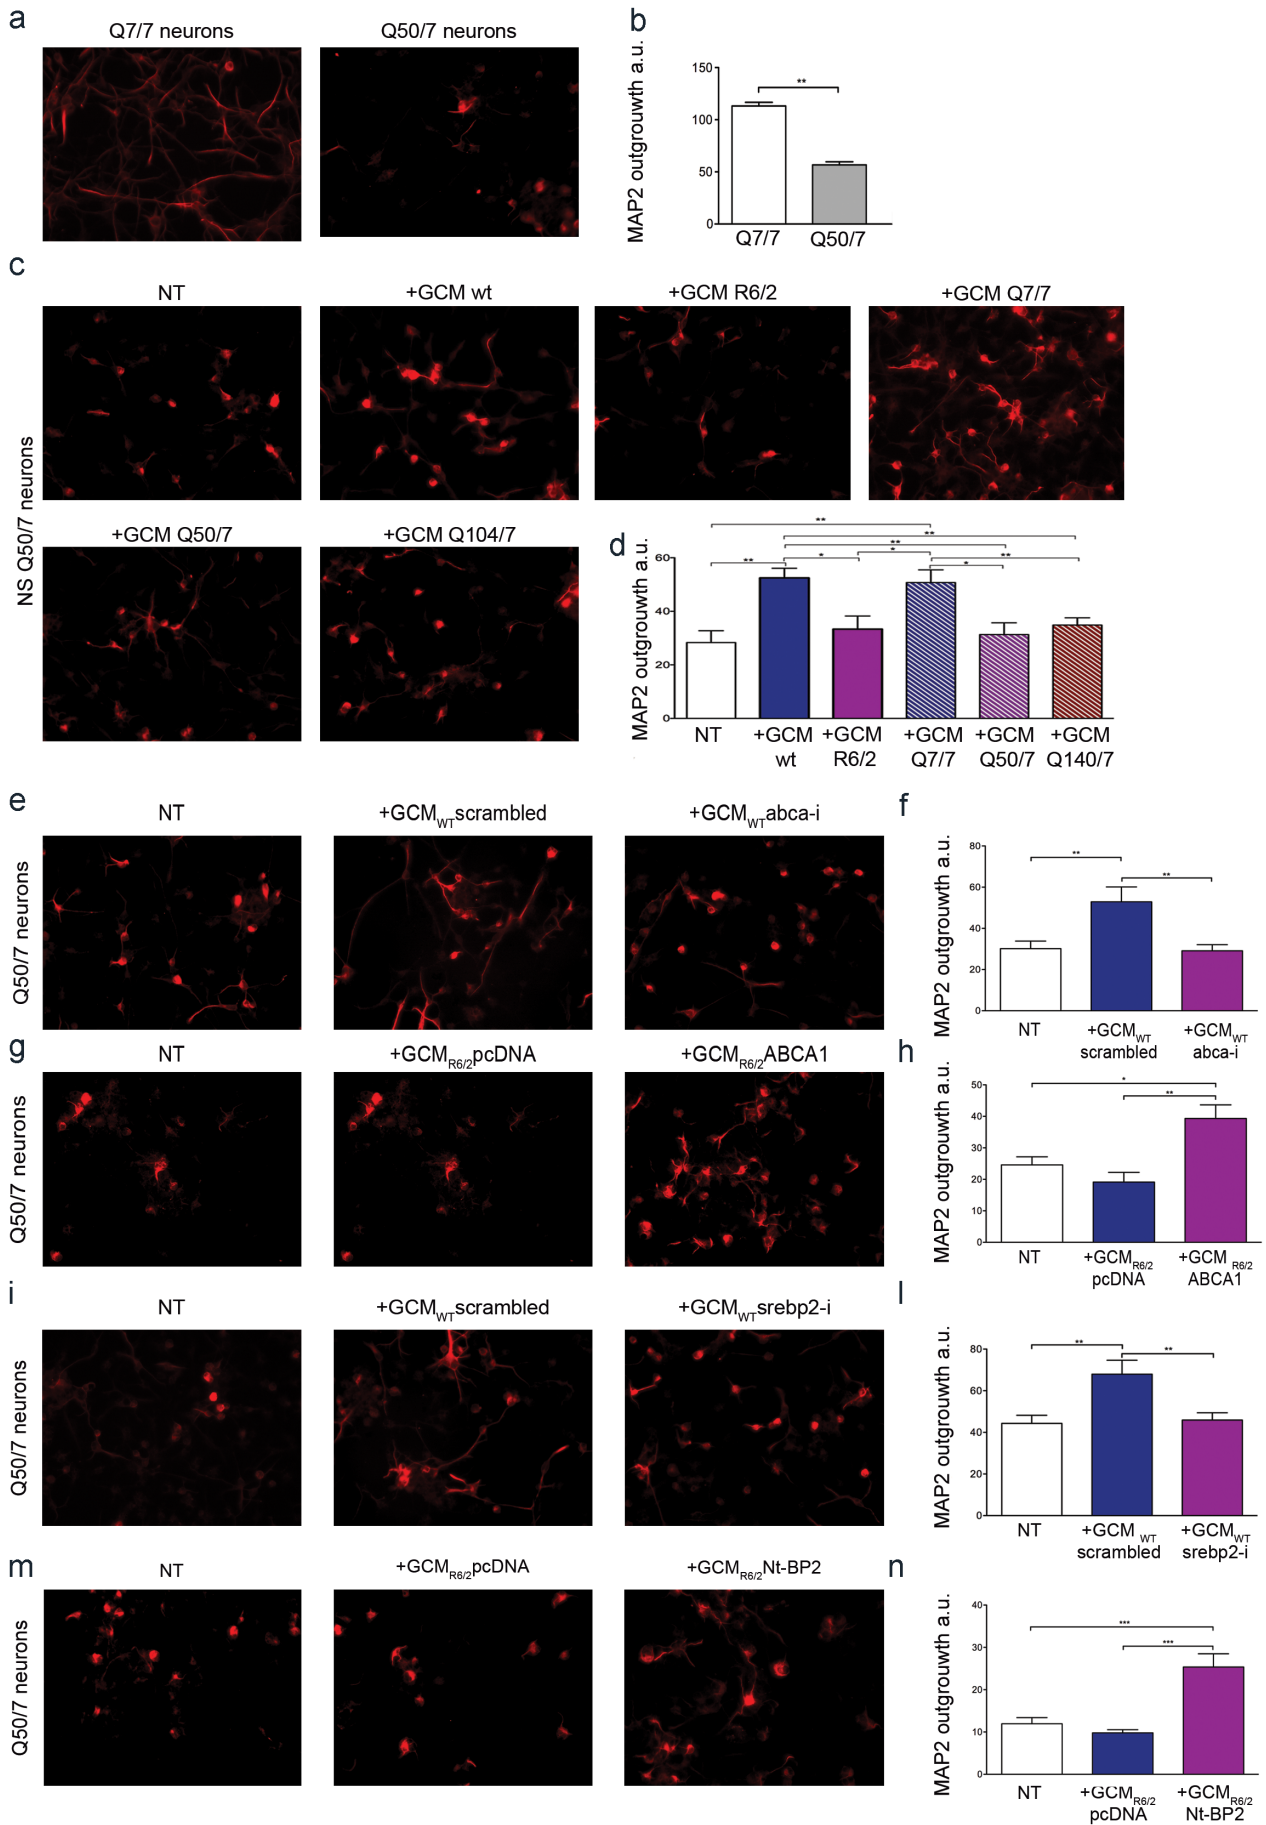

**Supplementary Figure 6.** (a–n) Representative immunofluorescence staining for MAP2 (a,c,e,g,i,m), and relative neurite outgrowth quantification (b,d,f,h,l,n) for the other HD NS-derived clone carrying HTT with 50Q (Q50/7) in the different conditions. The graphs (b,d,f,h,l,n) show the mean (a.u.)  $\pm$  s.e.m. of one experiment in which 10 fields were analyzed for each condition. Similar results were obtained in two other independent differentiations. Statistics: one-way ANOVA, Newman–Keuls multiple-comparison post-test (b). \* $P < 0.05$ ; \*\* $P < 0.01$ ; \*\*\* $P < 0.001$ . Original magnification: 20 $\times$ .

## Supplementary Figure 7

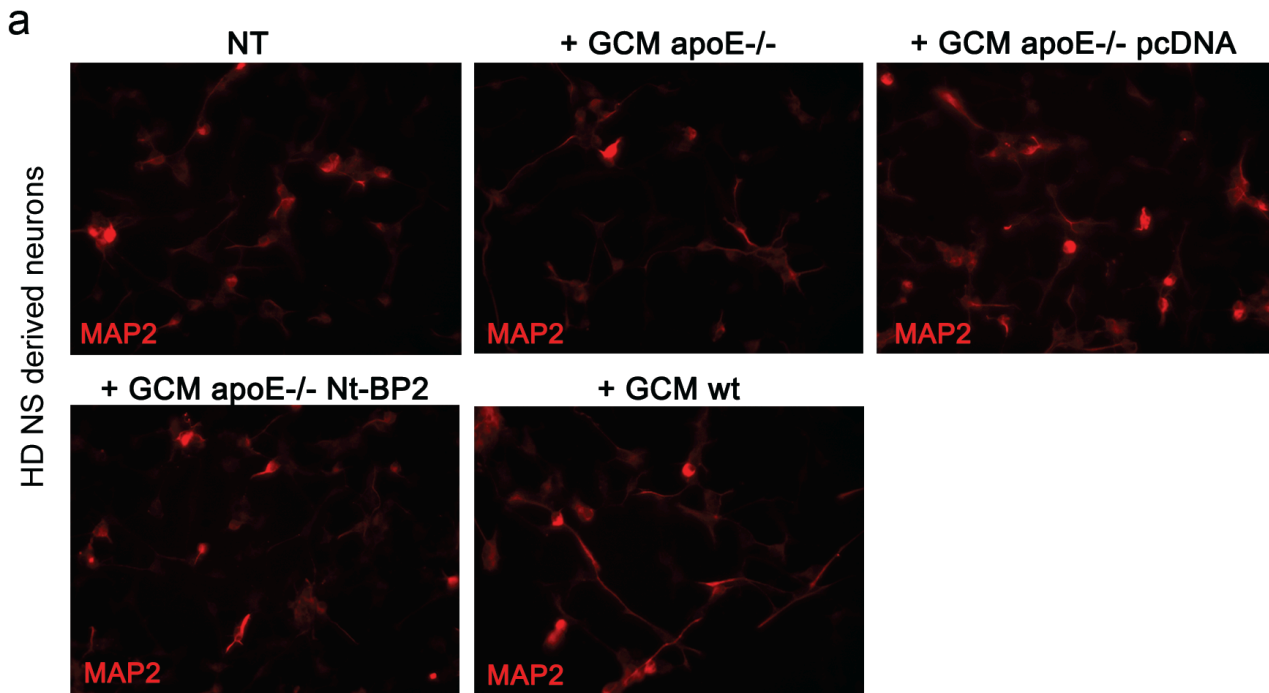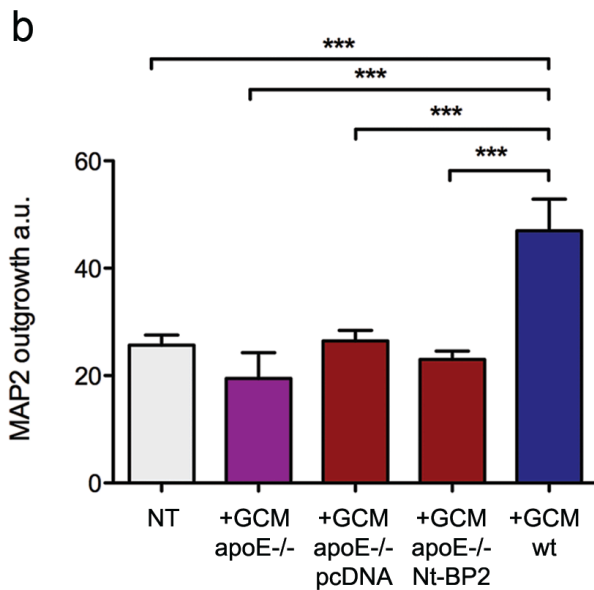

**Supplementary Figure 7.** (a) Representative immunofluorescence staining for MAP2 in HD NS-derived neurons under glial-free conditions (NT) or in the presence of GCM from primary astrocytes of apoE<sup>-/-</sup> mice (GCM apoE<sup>-/-</sup>), apoE<sup>-/-</sup> mice over-expressing an empty vector (pcDNA) or over-expressing the active form of SREBP2 (Nt-BP2) compared to GCM from wt mice (GCM wt). Original magnification: 20 $\times$ . (b) Relative neurite outgrowth quantification. The graph shows the mean of an arbitrary value (a.u.)  $\pm$  s.e.m. from one experiment in which 10 fields were analyzed for each condition. Statistics: one-way ANOVA, Newman-Keuls multiple-comparison test. \* $P < 0.05$ ; \*\* $P < 0.01$ ; \*\*\* $P < 0.001$ .

## Supplementary Figure 8

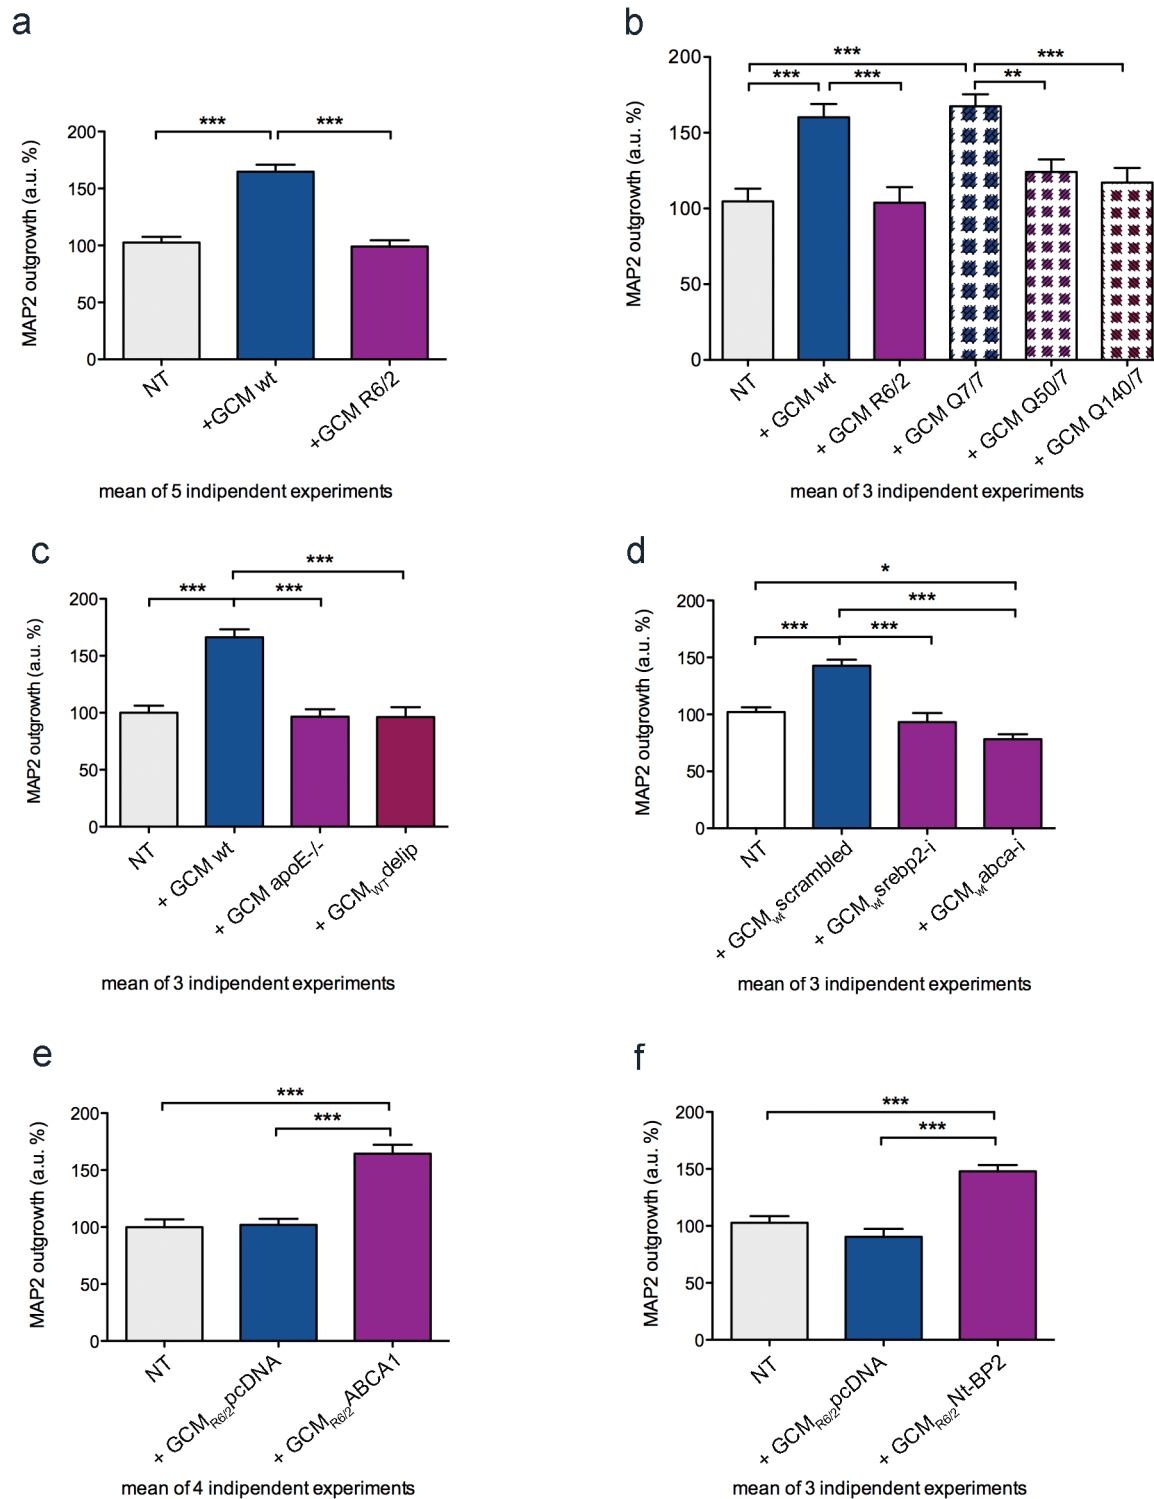

**Supplementary Figure 8.** (a–f) Graphs showing neurite outgrowth quantification in Q140/7 neurons expressed as % above the relative controls, as mean of all the independent experiments performed in this work. Statistics: one-way ANOVA, Newman–Keuls multiple-comparison post-test (b). \* $P < 0.05$ ; \*\* $P < 0.01$ ; \*\*\* $P < 0.001$ .

**Supplementary Figure 9** – Full-length pictures of the blot presented in the main figures

**Fig. 1b**

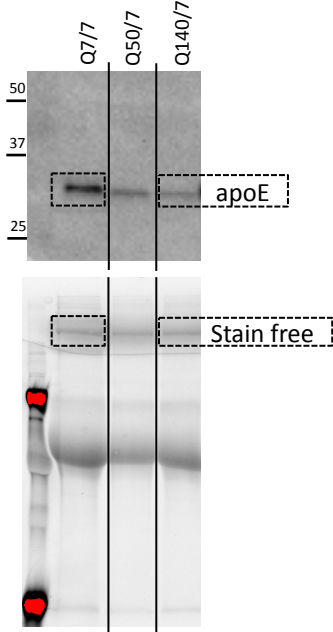

Note: the lines indicate the lane excised from image in Fig. 1b

**Fig. 1c**

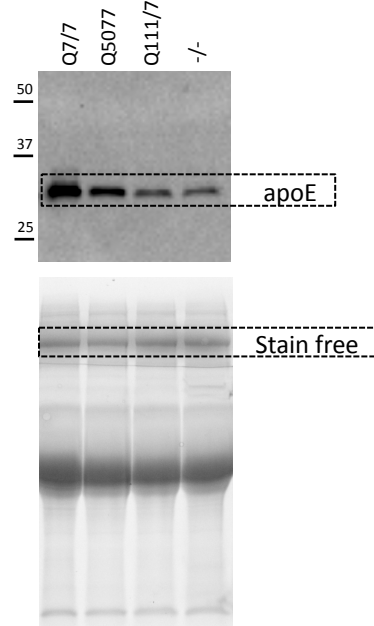

**Fig. 1d**

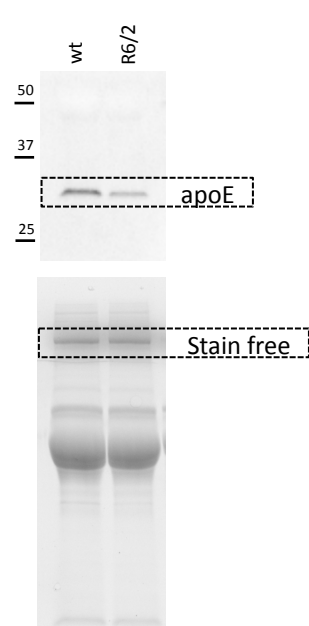

**Fig. 3b**

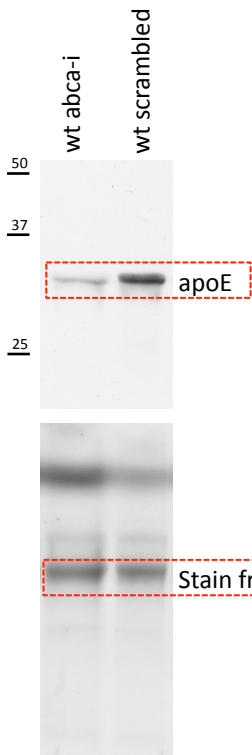

**Fig. 4b**

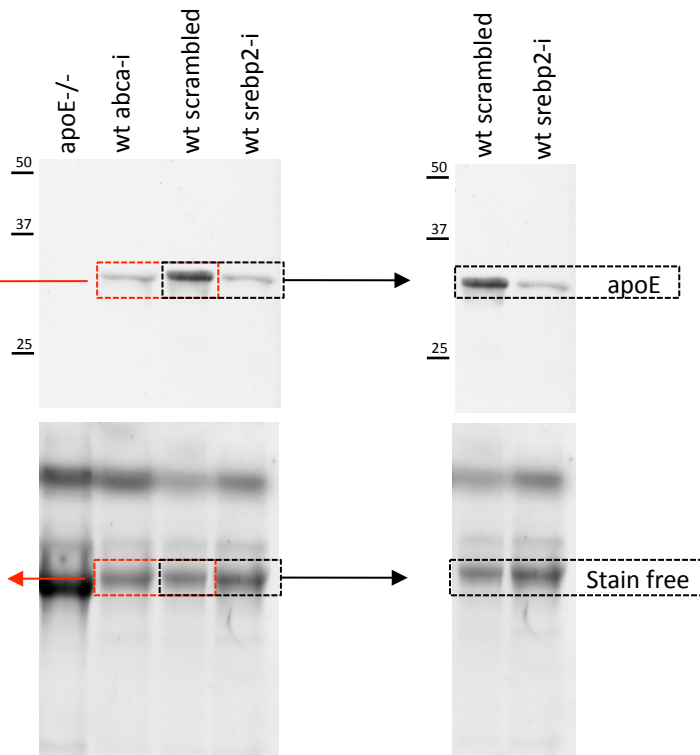

Note: silencing for abca1 and srebp2 was done in the same experiments and all the samples were run together. The control sample (GCM<sub>wt</sub> scrambled) in Fig. 3b and in Fig. 4b is the same



**Fig. 3e**

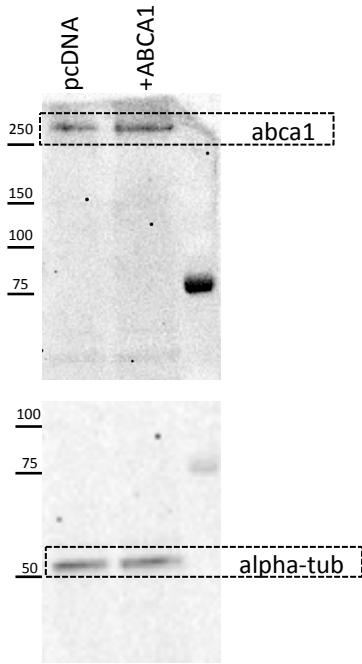

**Fig. 3f**

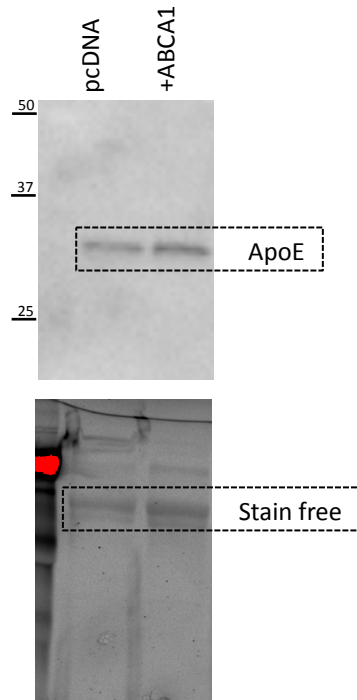

**Fig. 5e**

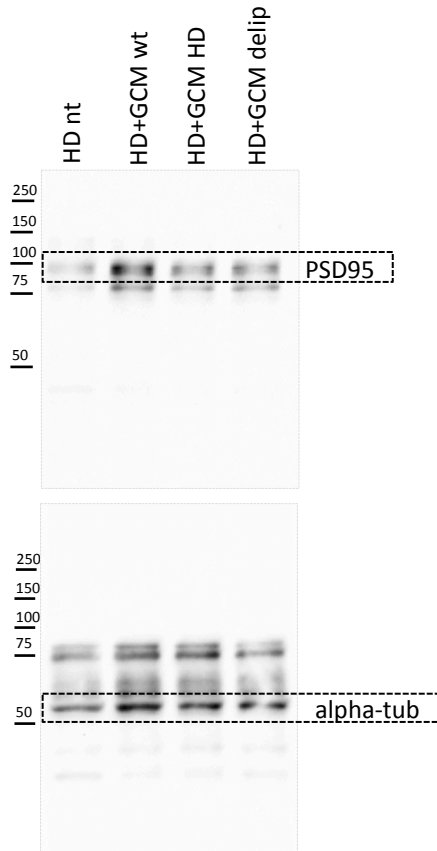

**Fig. 5f**

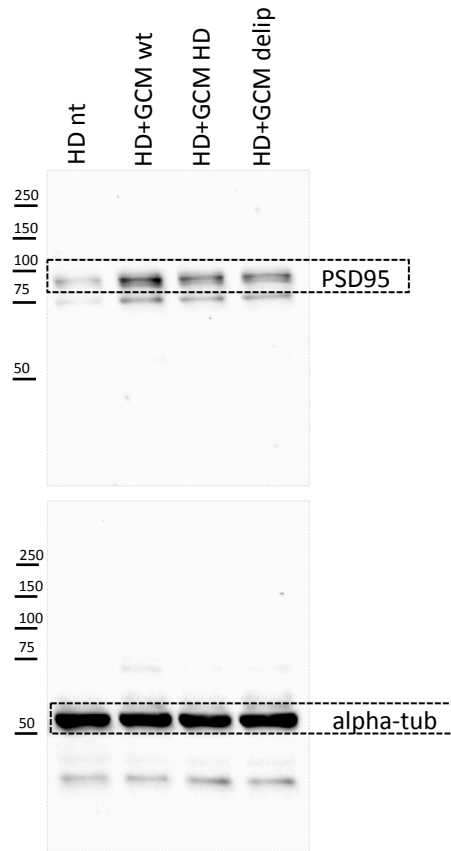

**Supplementary Figure 9. (a-f)** Full-length pictures of the plots presented in the main figures. Dashed boxes indicate the bands shown in the figures.
